# Supplementary material for: Copper Nanowires Modified with Graphene Oxide Nanosheets for Simultaneous Voltammetric Determination of Ascorbic Acid, Dopamine and Acetaminophen
Source: PubMed Central journal article supplement (PMC6631772; doi:10.3390/molecules24122320), 2019-06-24
Supplement: molecules-24-02320-s001.pdf [file molecules-24-02320-s001.pdf]

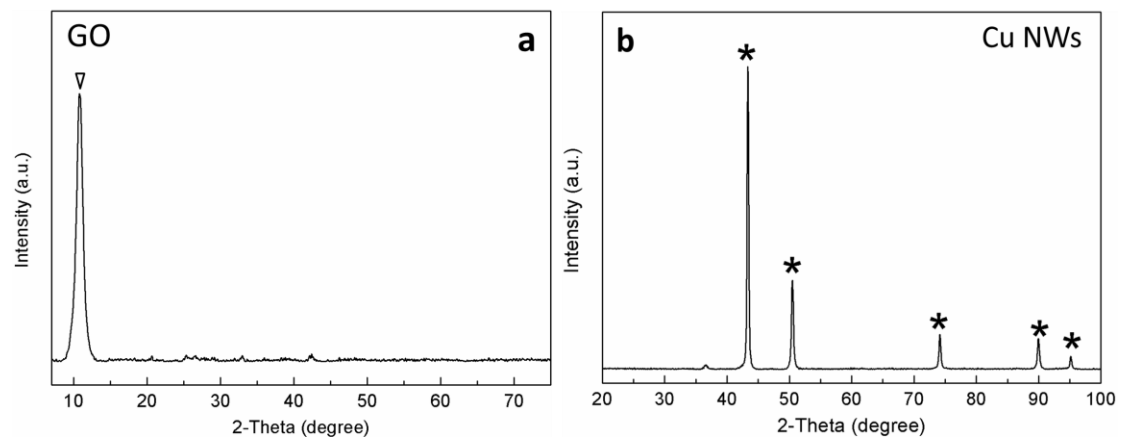

Figure S1. The XRD patterns of (a) GO and (b) Cu NWs.

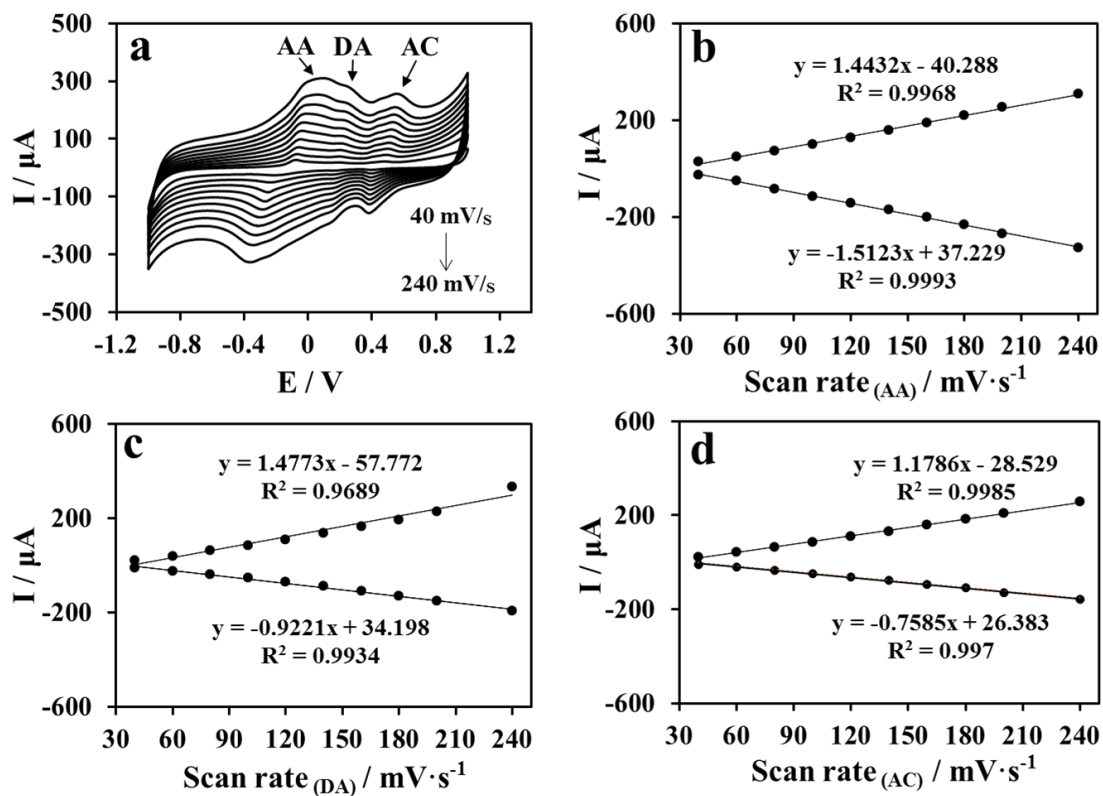

Figure S2. (a) Cyclic voltammograms of the Nafion/Cu NWs-GO/GCE in 0.1M PBS (pH 7.0) containing 20  $\mu\text{M}$  AA, 50  $\mu\text{M}$  DA, and 50  $\mu\text{M}$  AC at different scan rates (40-240  $\text{mV}\cdot\text{s}^{-1}$ ) and the corresponding plots of current vs. scan rate of (b) AA, (c) DA, and (d) AC.

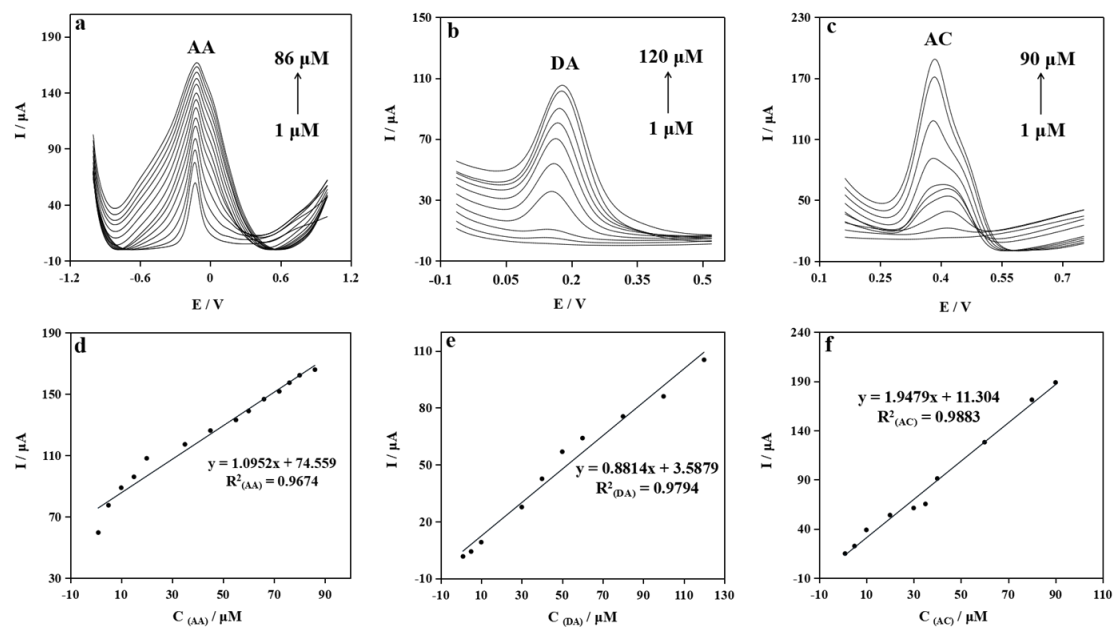

Figure S3. DPVs of Nafion/Cu NWS-GO/GCE in 0.1M PBS (pH 7.0) containing (a) AA: 1, 5, 10, 15, 20, 35, 45, 55, 60, 66, 72, 76, 80, 86  $\mu\text{M}$ ; (b) DA: 1, 5, 10, 30, 40, 50, 60, 80, 100, 120  $\mu\text{M}$ ; and (c) AC: 1, 5, 10, 20, 40, 50, 80, 90, 100, 110  $\mu\text{M}$ . The corresponding calibration plots of (d) AA, (e) DA, and (f) AC, respectively.

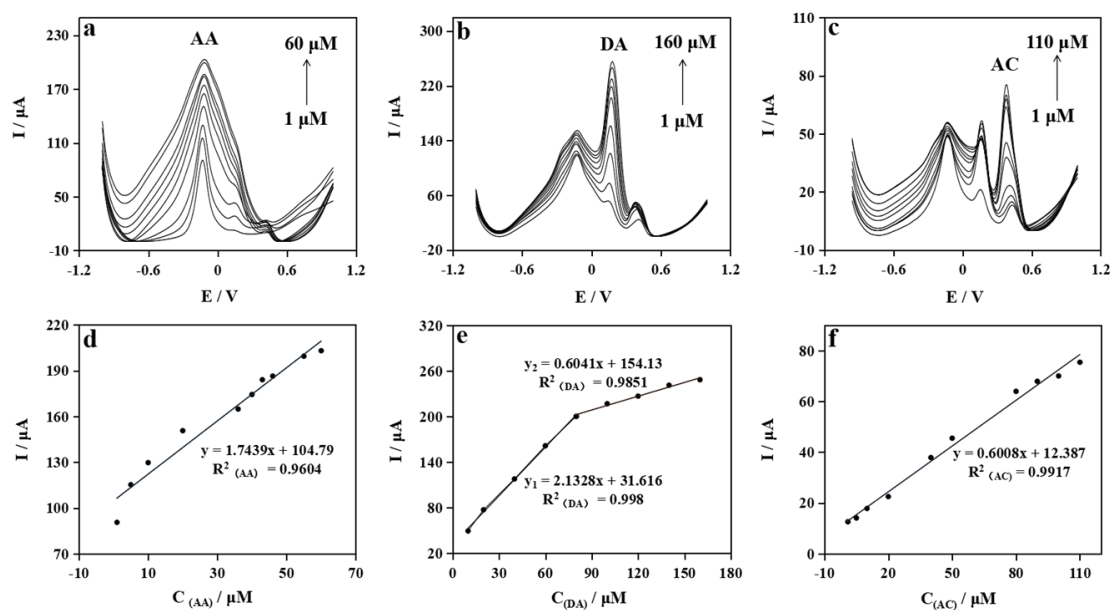

Figure S4. DPVs at Nafion/Cu NWs-GO/GCE in 0.1 M PBS (pH 7.0) (a) containing 10  $\mu\text{M}$  DA, 10  $\mu\text{M}$  AC and different concentrations of AA: 1, 5, 10, 20, 36, 40, 43, 46, 55, 60  $\mu\text{M}$ ; (b) containing 0.01  $\mu\text{M}$  AA, 10  $\mu\text{M}$  AC and different concentrations of DA : 10, 20, 40, 60, 80, 100, 120, 140, 160  $\mu\text{M}$ ; (c) containing 10  $\mu\text{M}$  AA, 10  $\mu\text{M}$  DA and different concentrations of AC : 1, 5, 10, 20, 40, 50, 80, 90, 100, 110  $\mu\text{M}$ . Plots of the anodic peak currents vs. (d) AA, (e) DA and (f) AC concentrations, respectively.

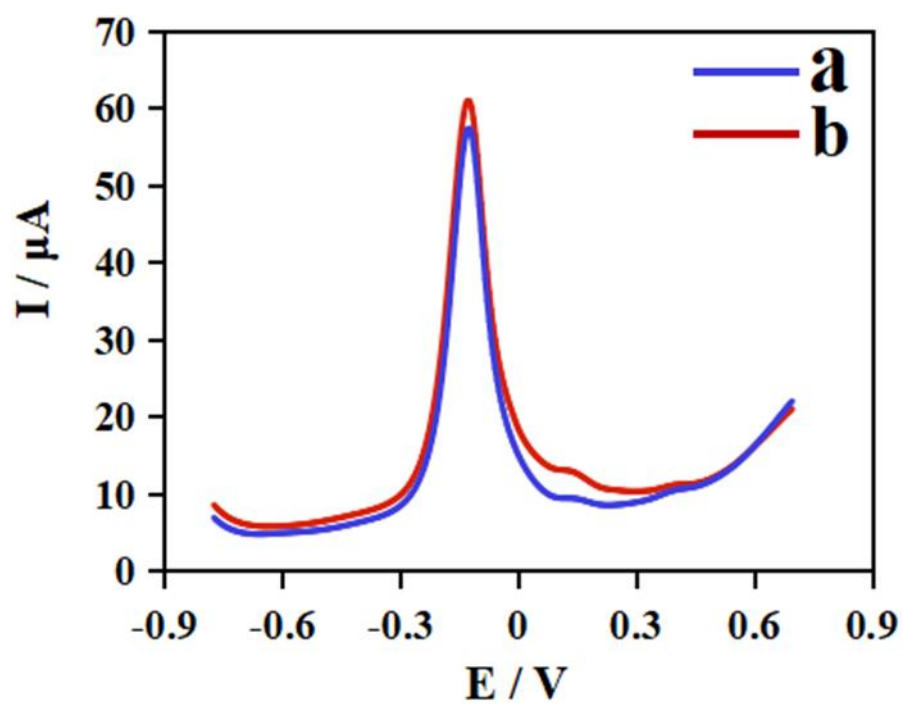

Figure S5. Interference test of Nafion/Cu NWs-GO/GCE upon the addition of different substances, DPVs with (a) 1  $\mu\text{M}$  AA, 1  $\mu\text{M}$  DA, 1  $\mu\text{M}$  AC and with (b) addition of 10 mM glucose, 20  $\mu\text{M}$  UA, 1 mM NaCl and 1 mM KCl.
